# Supplementary material for: Amorphous-to-Crystalline Transition Strategy Boosting Copper-Nickel Bimetallic Anchored Hollow Covalent Organic Framework Nanozyme for Colorimetric Sensing of Epinephrine
Source: Research Square preprint supplement (doi:10.21203/rs.3.rs-7188031/v1), 2025-07-30
Supplement: Supplementary file 1 [file 2364c5c60349607aa9c8548e.docx]

**Supporting Information**

**Amorphous-to-Crystalline Transition Strategy Boosting Copper-Nickel Bimetallic Anchored Hollow Covalent Organic Framework Nanozyme for Colorimetric Sensing of Epinephrine**

Ran Na1, Yuying Yuan1, Ziyi Yang1, Jianliang Chen1, Yixi Gu*,2 Ting Bao*,1, Xiuhua Zhang1, Shengfu Wang1, Wei Wen*,1

1Ministry of Education Key Laboratory for the Synthesis and Application of Organic Functional Molecules, Hubei Key Laboratory for Precision Synthesis of Small Molecule Pharmaceuticals, College of Chemistry and Chemical Engineering, Hubei University, Wuhan 430062, P. R. China

2Analysis and Testing Center, Wuhan Institute of Technology, No. 206 Guanggu 1st Road,Wuhan 430205, China

*** Corresponding author:**

Wei Wen, E-mail address: wenwei@hubu.edu.cn.

Ting Bao, E-mail address: baoting@hubu.edu.cn.

Yixi Gu, E-mail address: guyixi@wit.edu.cn.

1. **Reagents and materials**

1,3,5-Tris(4-aminophenyl) benzene (TAPB) and benzene-1,3,5-tricarboxaldehyde (BTCA) were purchased from Chinese Academy of Sciences Yanshen Technology Co., Ltd. (Jilin, China). Copper chloride dihydrate (CuCl2•2H2O), nickel chloride hexahydrate (NiCl2•6H2O), ascorbic acid (AA), ractopamine (Ra), L-arginine (Arg), L-histidine (His) and horseradish peroxidase (HRP) were purchased from Aladdin Reagent Co., Ltd. (Shanghai, China). Isopropanol, 1,4-dioxane, 1,3,5-trimethylbenzene, dopamine (DA), clenbuterol hydrochloride (Clen), salbutamol (Sal), and potassium chloride (KCl) were purchased from Sinopharm Group Co., Ltd. 3,3',5,5'-Tetramethylbenzidine (TMB), 2,4-dichlorophenol (2,4-DP) and 4-aminoantipyrine (4-AP) was obtained from Source Leaf Biological Co., Ltd (Shanghai, China).

1. **Instruments**

The morphologies of nanomaterials were characterized by Talos F200X transmission electron microscopy (Thermo, American) and Sigma 500 field-emission scanning electron microscopy (ZEISS, Germany). X-ray photoelectron spectroscopy (XPS) was performed with a JSM6510LV instrument (Jeol, Japan). The powder X-ray diffraction (PXRD) was recorded on a D8 Advance X-ray diffractometer (Bruker Corporation, Germany). Fourier transform infrared (FT-IR) spectra were recorded by Scientific Niocolet iS50 Fourier transform infrared spectroscopy (Thermo, Fisher Scientific, America). UV-vis spectra were obtained by UV-2700 spectroscopy (Shimadzu, Japan). The nitrogen adsorption-desorption isotherm was measured on a surface area and porosity analyzer (MIC-2460, Micromeritics, America).

**Figures**


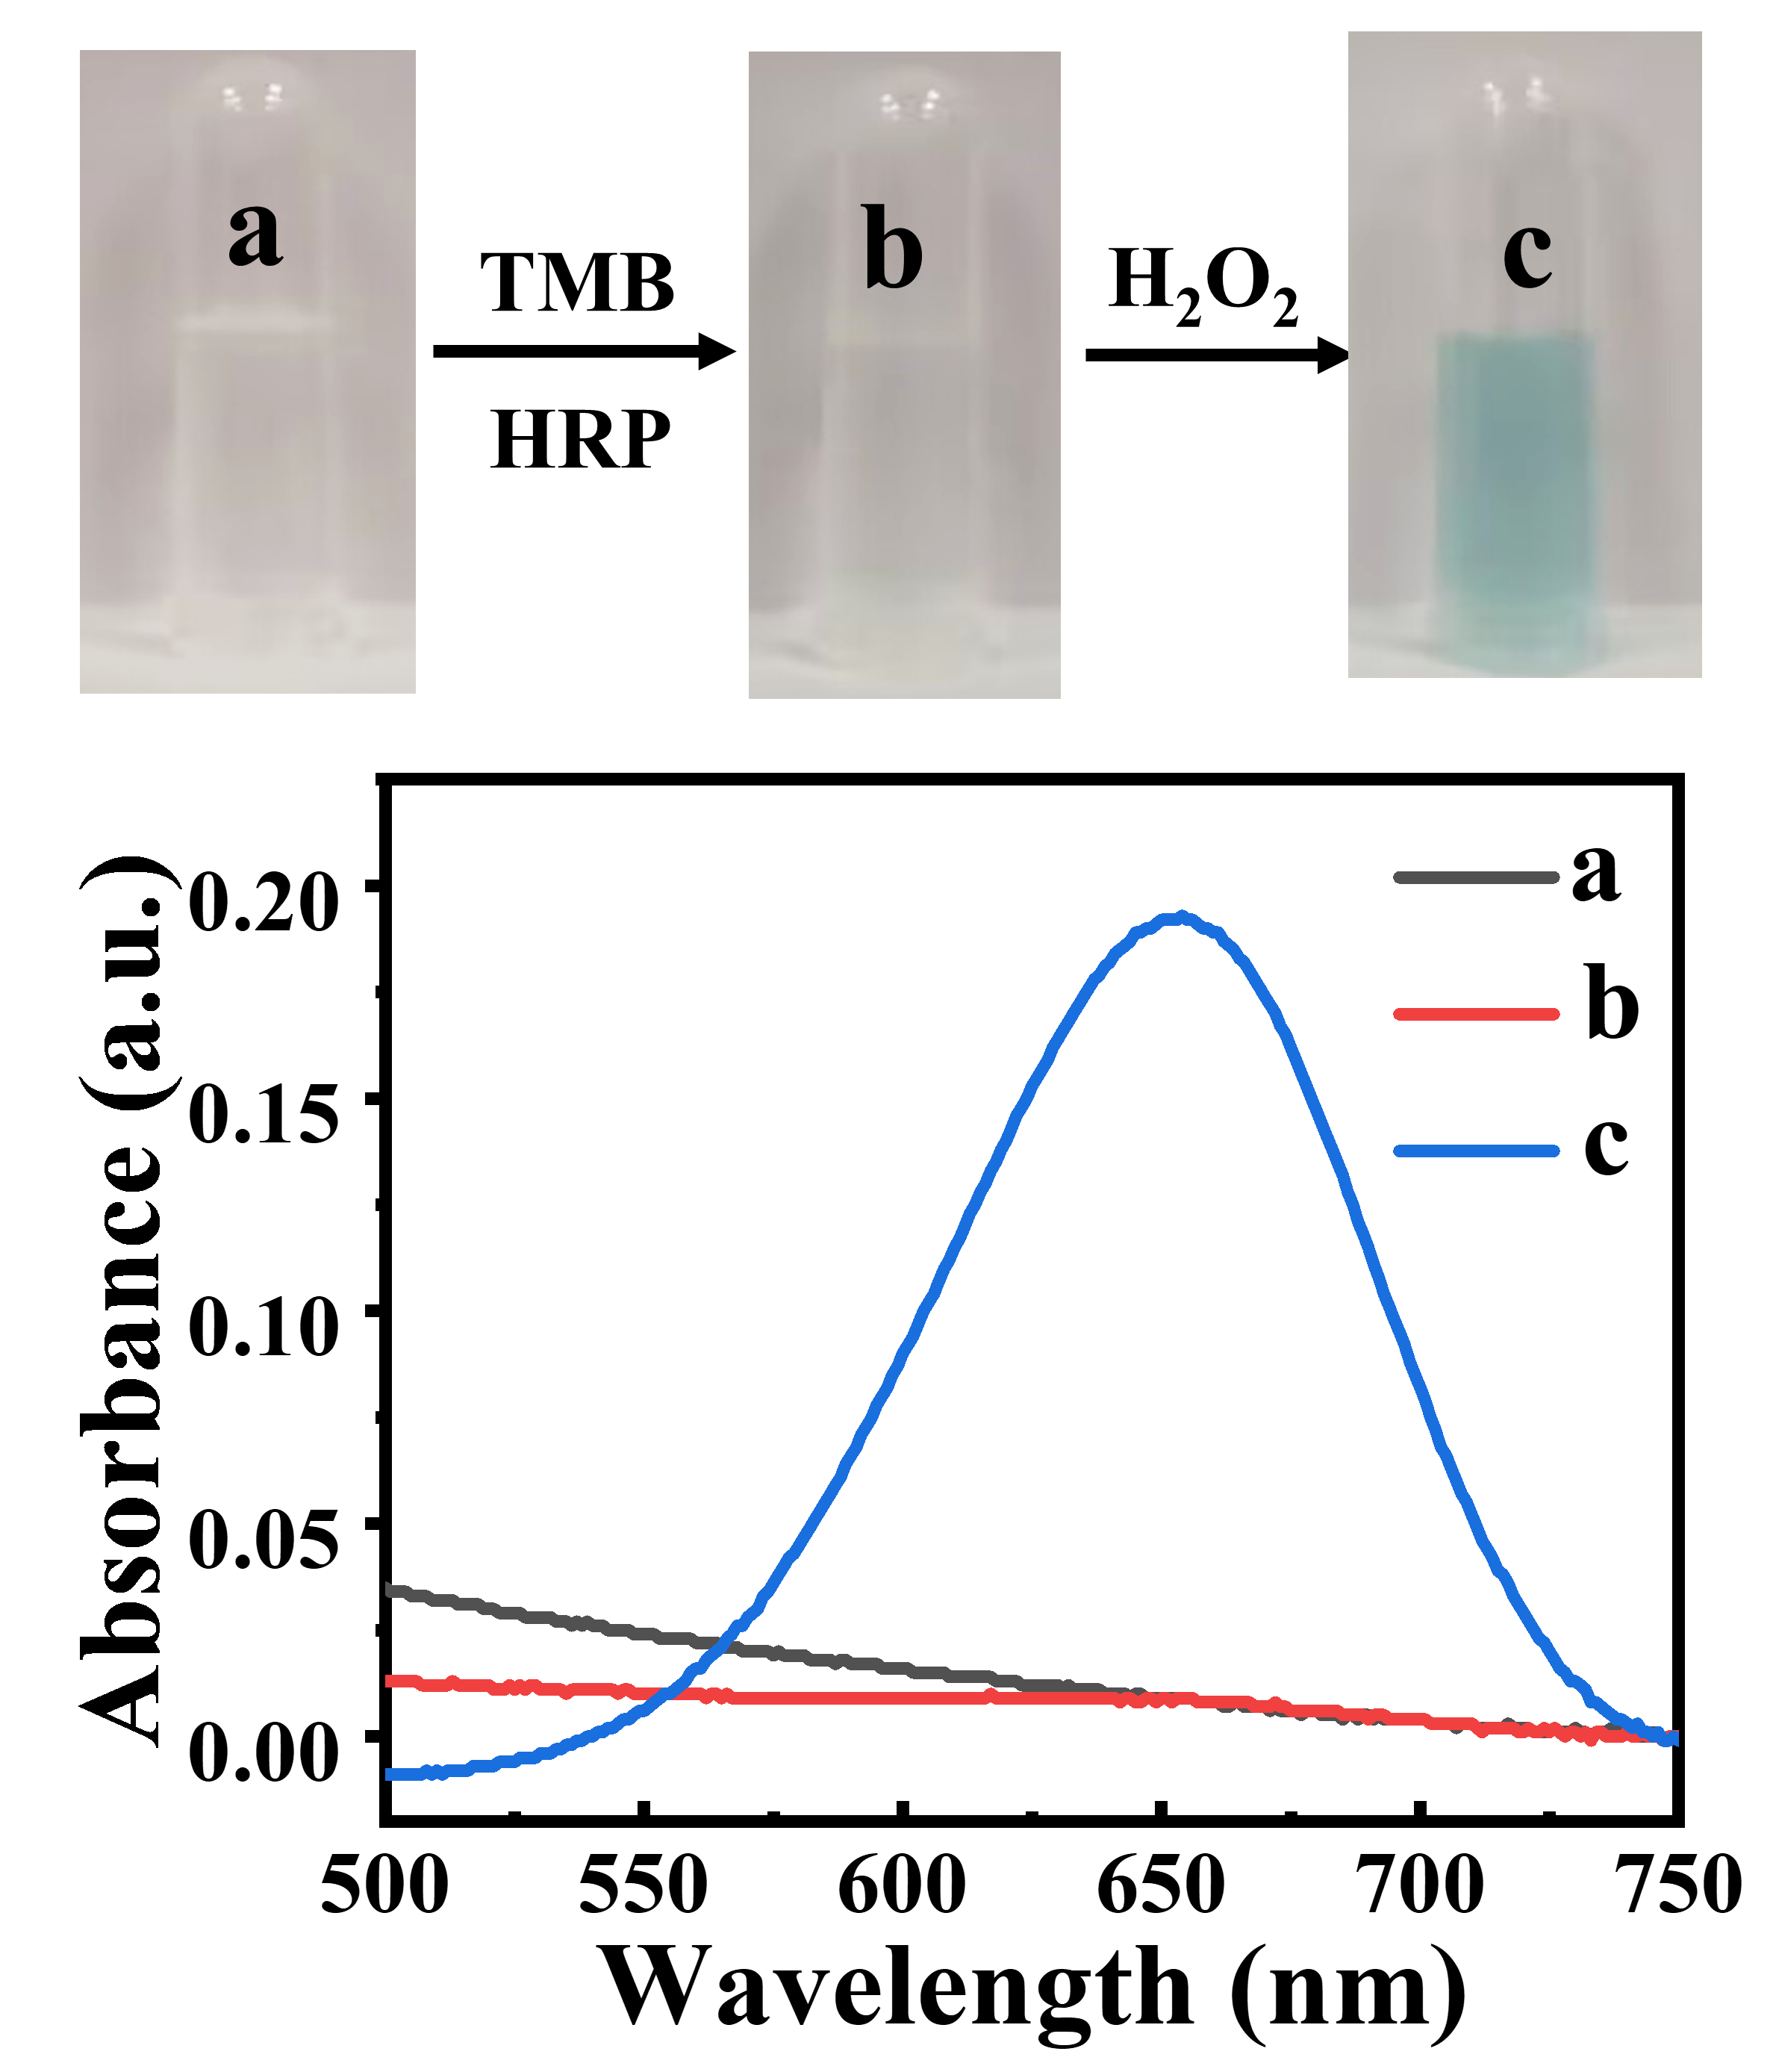


**Fig. S1** UV-vis absorption spectra of reaction solution: (a) Cu-Ni/HCOF + 2,4-DP, (b) a + TMB + HPR, (c) b + H2O2 (inset: photographs of the corresponding reaction solution)


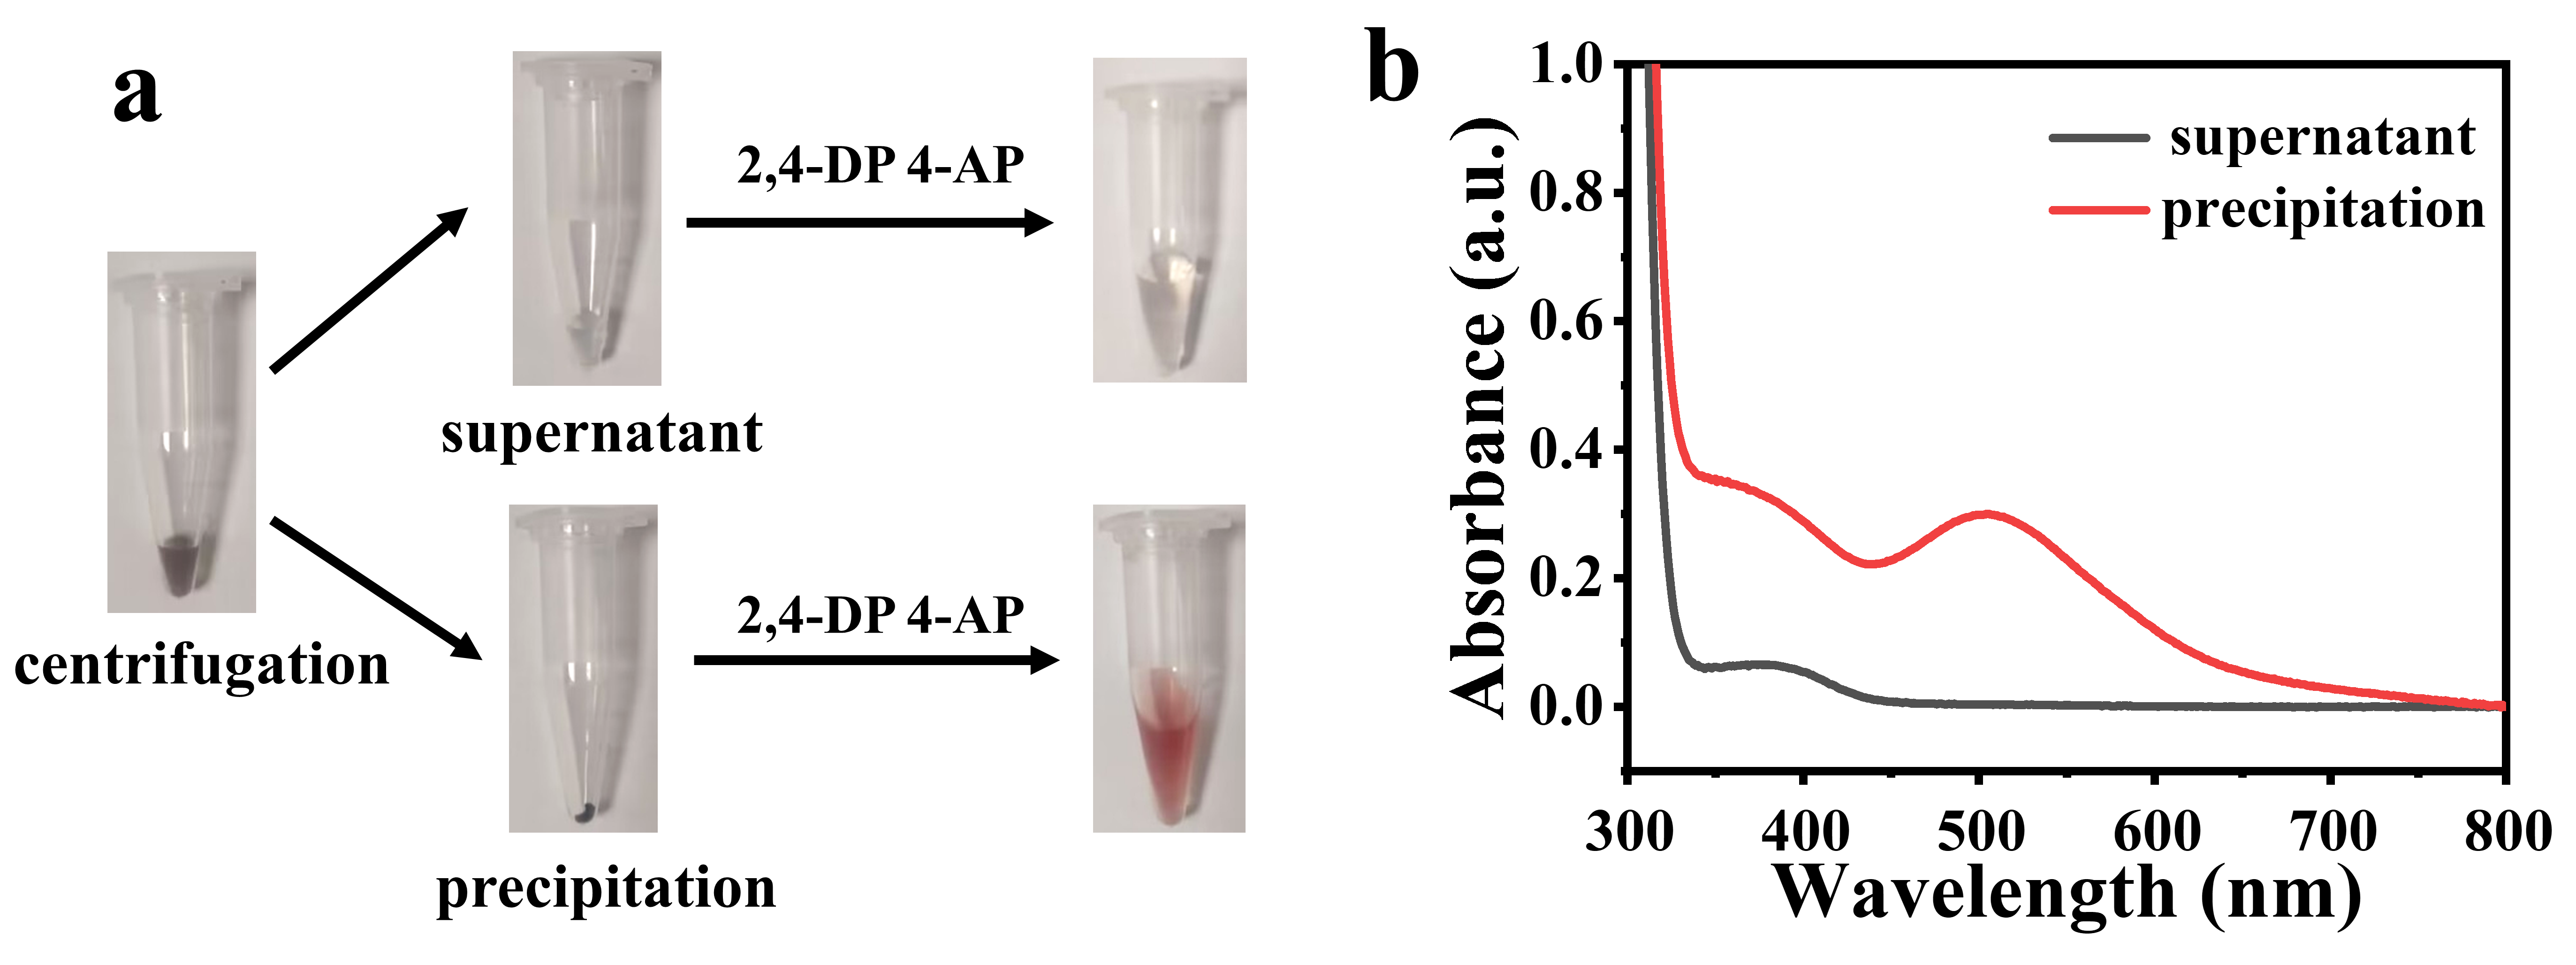


**Fig. S2** Photographs of Cu-Ni/HCOF nanozyme catalytic process: (a) the supernatant reacted with 2,4-DP and 4-AP, (b) the precipitation reacted with 2,4-DP and 4-AP.


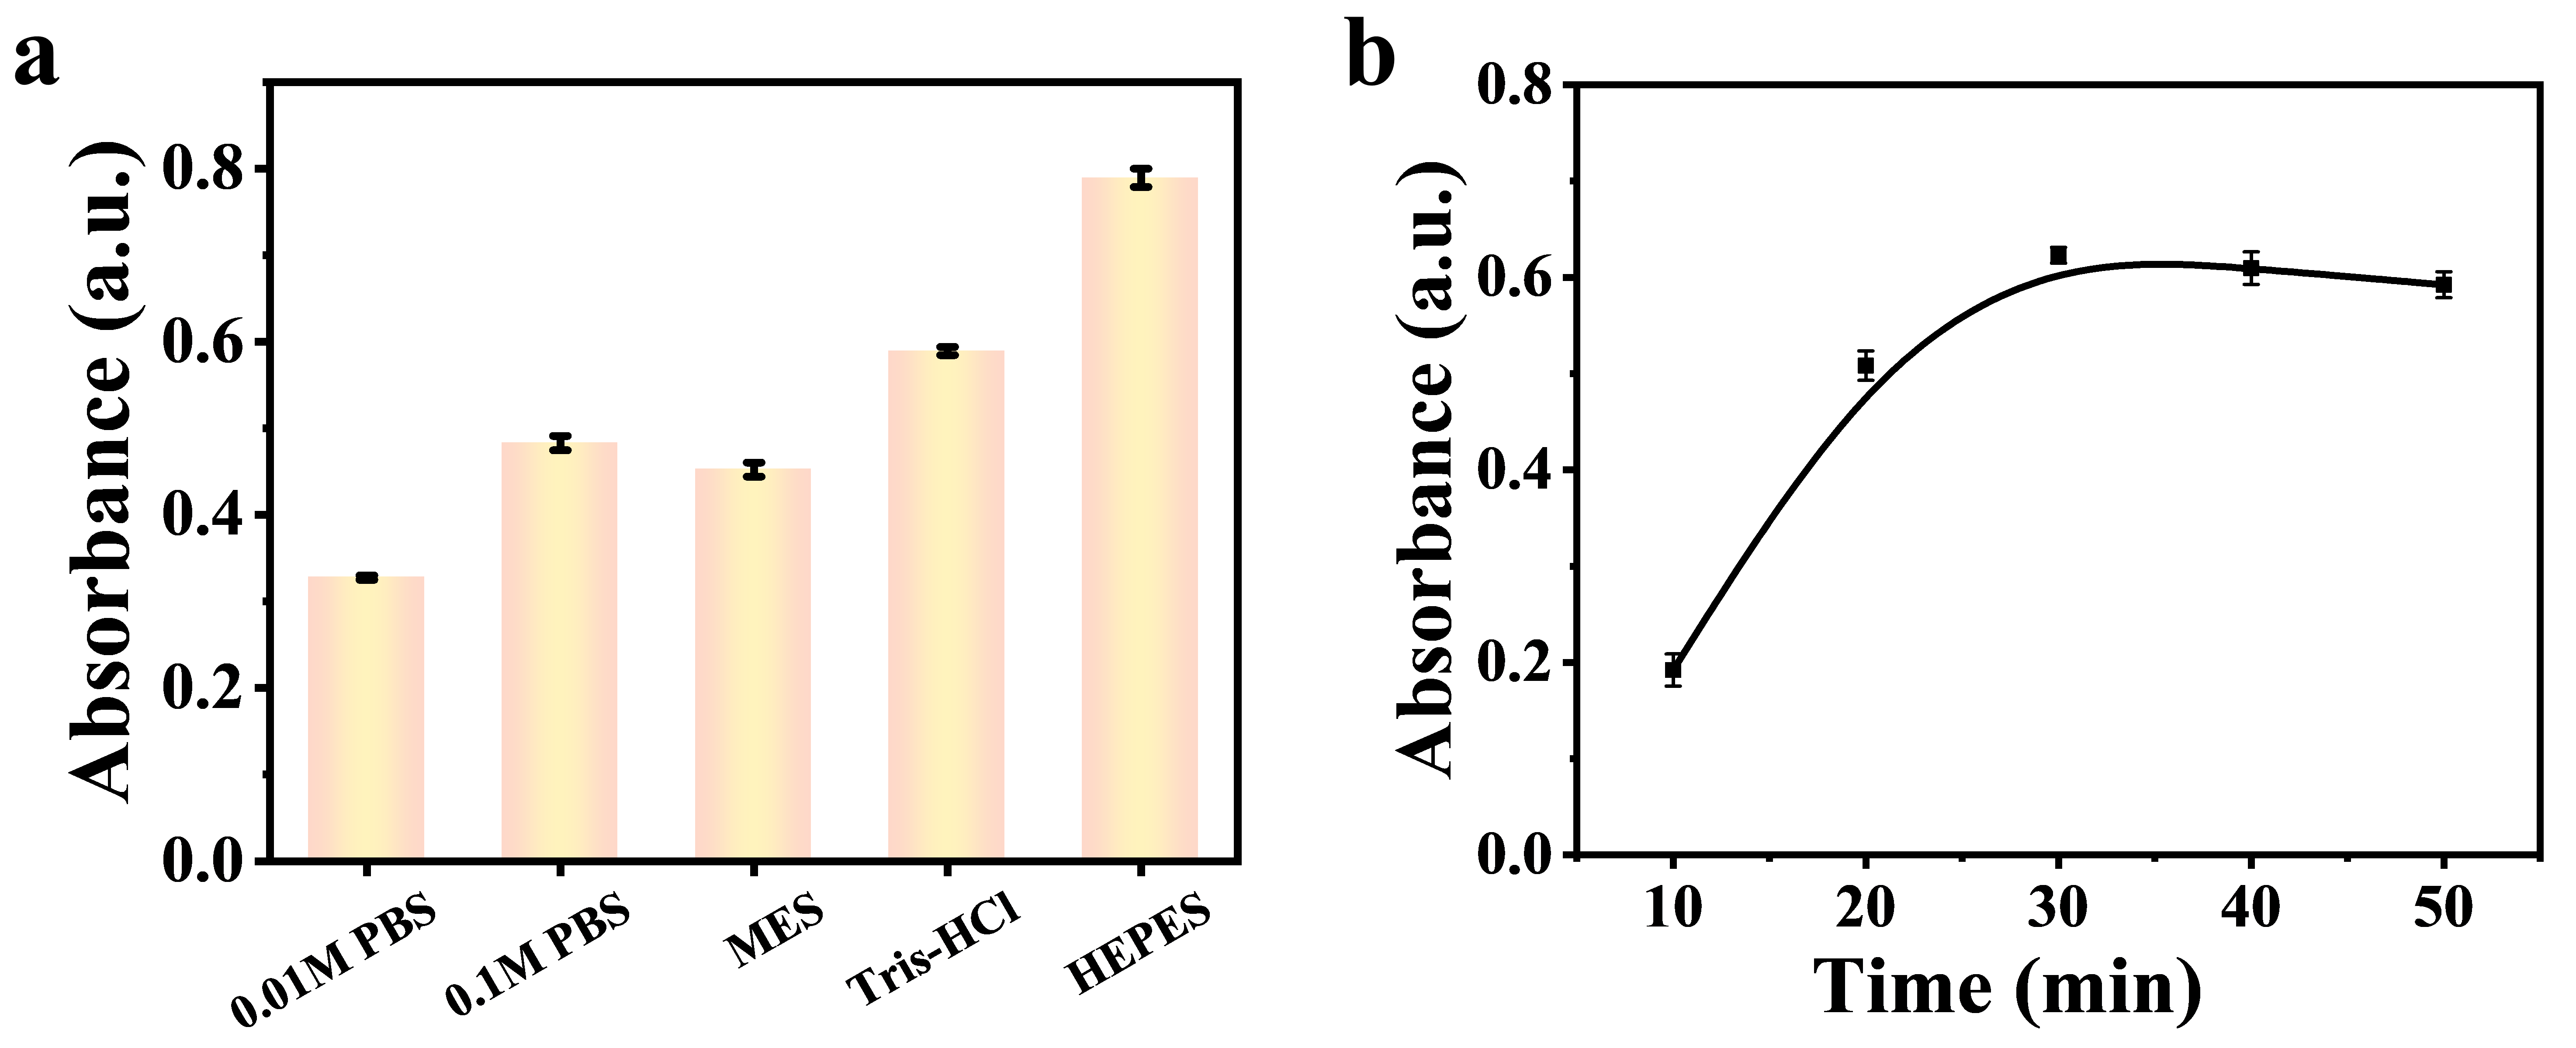


**Fig. S3** Optimization of the experimental conditions: **a** Buffer solution. **b** Catalytic time of Cu-Ni/HCOF nanozyme.


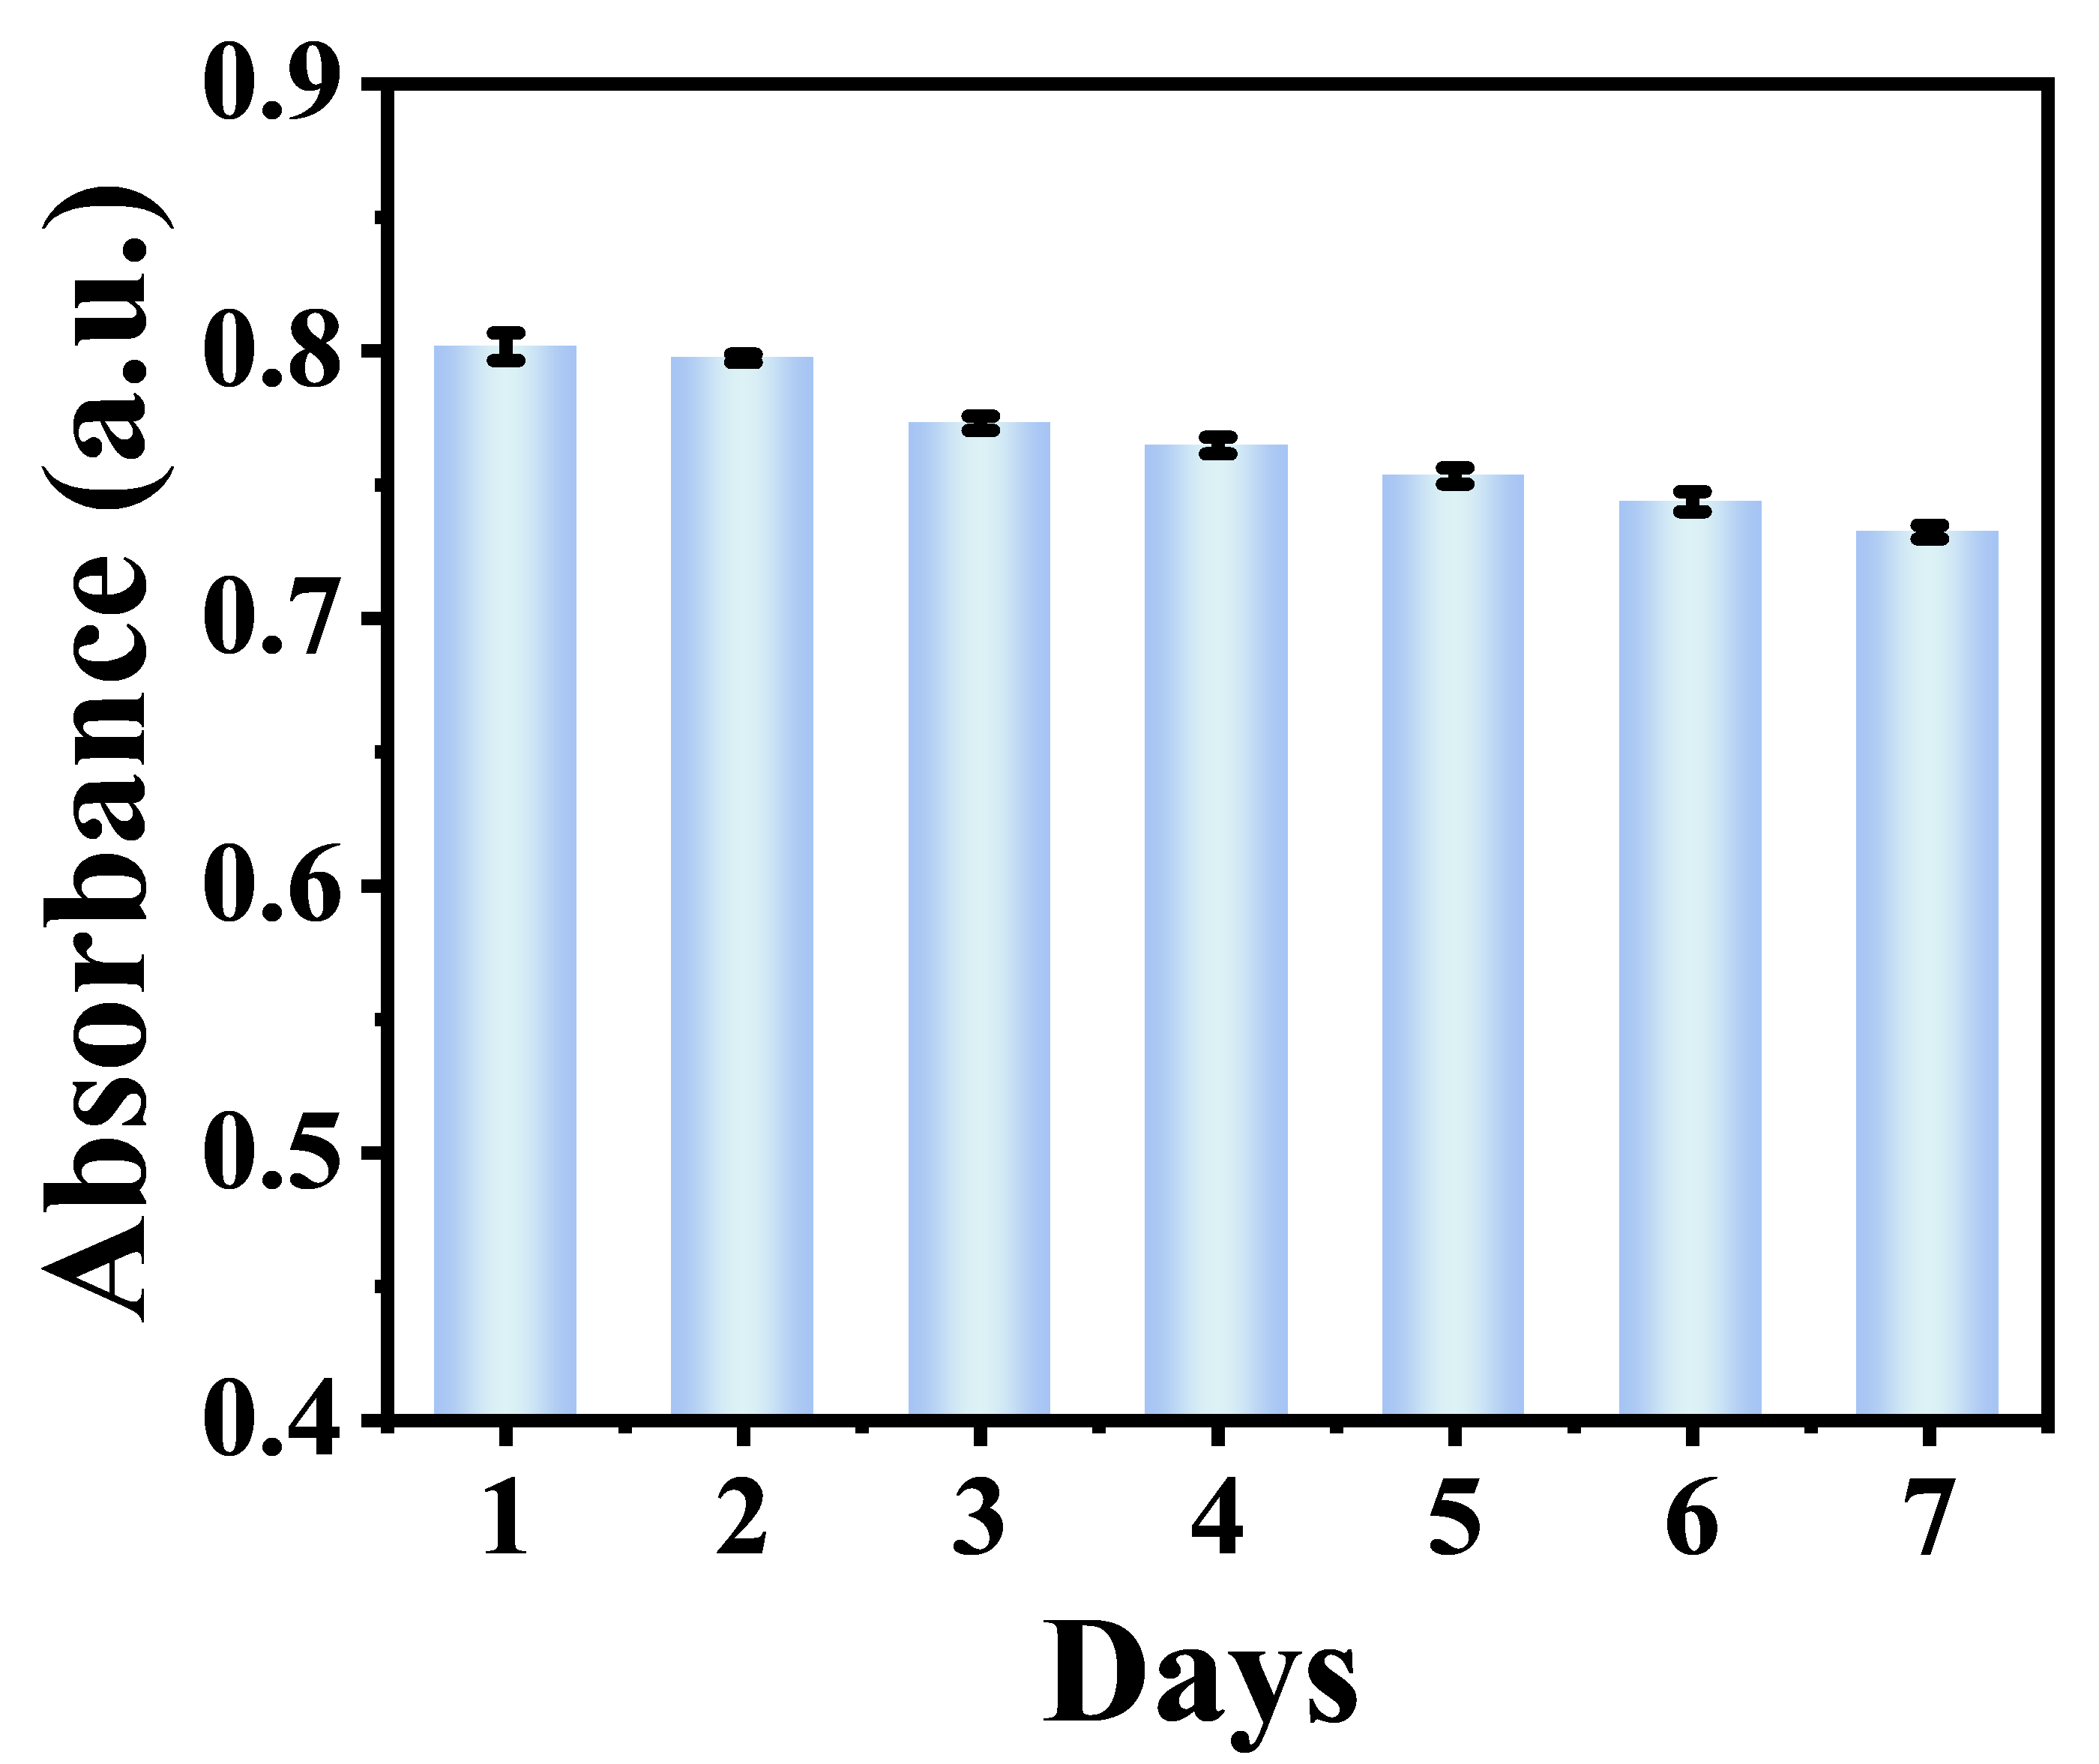


**Fig. S4** Stability of the Cu-Ni/HCOF nanozyme after stored at room temperature for 7 days.

**Tables**

**Table S1** Comparison of kinetic parameters of Cu-Ni/HCOF nanozyme with other laccase mimetics.

| **Complex** | **Substrate** | ***Km*** | ***Vmax*** | **Reference** |
| --- | --- | --- | --- | --- |
| CH-Cu | 2,4-DP | 0.42 mM | 0.122 μM·s-1 | 1 |
| I-Cu | 2,4-DP | 0.172 mM | 0.410 μM·s-1 | 2 |
| Ce-MOF-808 | 2,4-DP | 0.13 mM | 0.037 μM·s-1 | 3 |
| Cu-Cys@COF-OMe | 2,4-DP | 0.75 mM | 16.83 μM·s-1 | 4 |
| Cu-Ni/HCOF | 2,4-DP | 0.14 mM | 0.26 μM·s-1 | This work |

**Table S2** Comparison of different reported methods for determination of EP.

| **Methods** | **Liner range** | **LOD** | **Reference** |
| --- | --- | --- | --- |
| Colorimetry | 3~20 μg mL-1 | 0.42 μg mL-1 | 5 |
| Electrochemistry | 10 ~ 640 μM | 1.4 μM | 6 |
| Colorimetry | 2-100 μM | 0.97 μM | 7 |
| Fluorescence | 1-120 μM | 0.14–2.10 nM | 8 |
| Fluorescence | 2~75 μM | 0.4 μM | 9 |
| Colorimetry | 1~50 μg mL-1 | 0.14 μg mL-1 | This work |

**References**

1. Wang J, Huang R, Qi W, Su R, Binks B, He Z (2019) Construction of a bioinspired laccase-mimicking nanozyme for the degradation and detection of phenolic pollutants. Appl Catal B 254: 452-462. <https://doi.org/10.1016/j.apcatb.2019.05.012.>
2. Wang J, Huang R, Qi W, Su R, He Z (2022) Construction of biomimetic nanozyme with high laccase- and catecholase-like activity for oxidation and detection of phenolic compounds. J Hazard. Mater 429: 128404. <https://doi.org/10.1016/j.jhazmat.2022.128404.>
3. Liang S, Wu X, Xiong J, Yuan X, Liu S, Zong M, Lou W (2022) Multivalent Ce-MOFs as biomimetic laccase nanozyme for environmental remediation. Chem Eng J 450: 138220. <https://doi.org/10.1016/j.cej.2022.138220.>
4. Tang Y, Jiang S, Li W, Shah S, Zhao Z, Pan L, Zhao Z (2022) Confined construction of COF@Cu-nanozyme with high activity and stability as laccase biomimetic catalyst for the efficient degradation of phenolic pollutants. Chem Eng J 448: 137701. <https://doi.org/10.1016/j.cej.2022.137701.>
5. Zhu J, Cui Q, Long T, Wang Y, Wen W, Tian Z, Zhang X , Wang S (2023) N-doped carbon Co/CoOx with laccase-like activity for detection of epinephrine. Microchim Acta 190:459. <https://doi.org/10.1007/s00604-023-06041-1.>
6. Leau S A, Lete C, Matei C, Lupu S (2023) Electrochemical sensing platform based on metal nanoparticles for epinephrine and serotonin. Biosensors 13:781. https://doi.org/10.3390/bios13080781
7. Fu Q, Wang N, Zhou C, Su X (2024) High performance boron doped peroxidase-like nanozyme Cu/B-NC for detection of epinephrine and catalase. Talanta 266: 124991. <https://doi.org/10.1016/j.talanta.2023.124991.>
8. Baluta S, Malecha K, Świst A, Cabaj J (2020) Fluorescence sensing platforms for epinephrine detection based on low temperature cofired ceramics. Sensors 20:1429. <https://doi.org/10.3390/s20051429.>
9. Luo C, Chen Y, Gu J, Cai H, Lin H, Jin Z, Huang C (2024) Activatable NIR fluorescence probe for epinephrine detection and bioimaging based on anionic heptamethine cyanine. Anal Chem 96:9969-9974. <https://doi.org/10.1021/acs.analchem.4c01309.>
